# Supplementary material for: Theoretical predictions for low-temperature phases, softening of phonons and elastic stiffnesses, and electronic properties of sodium peroxide under high pressure
Source: Royal Society of Chemistry journal article supplement (doi:10.1039/c9ra03735g), 2019-01-01
Supplement: c9ra03735g1.pdf [file c9ra03735g1.pdf]

## Electronic Supplementary Information (ESI)

### Theoretical predictions for low-temperature phases, softening of phonons and elastic stiffnesses, and electronic properties of sodium peroxide under high pressure

Pornmongkol Jimlim,<sup>a,b,c</sup> Prutthipong Tsuppayakorn-aek,<sup>a,b</sup> Teerachote Pakornchote,<sup>a,b</sup>  
Annop Ektarawong,<sup>a,b</sup> Udomsilp Pinsook,<sup>a,b</sup> and Thiti Bovornratanaraks<sup>a,b</sup>

<sup>a</sup> Extreme Conditions Physics Research Laboratory, Physics of Energy Materials Research Unit,  
Department of Physics, Faculty of Science, Chulalongkorn University, Bangkok 10330, Thailand

<sup>b</sup> Thailand Center of Excellence in Physics, Commission on Higher Education, Bangkok 10400, Thailand

<sup>c</sup> Department of Physics, Mahidol Wittayanusorn School, Nakhon Pathom 73170, Thailand

E-mail: thiti.b@chula.ac.th

| Index                                                                                                                                                                                                                                                                                                                                                 | Page |
|-------------------------------------------------------------------------------------------------------------------------------------------------------------------------------------------------------------------------------------------------------------------------------------------------------------------------------------------------------|------|
| <b>Table S1.</b> Structural data of Na <sub>2</sub> O <sub>2</sub> for the <i>Amm2</i> , the <i>P-62m</i> , the <i>P2<sub>1</sub>/c</i> , the <i>Pbam</i> , the <i>Pbam</i> <sup>‡</sup> , the <i>C2/m</i> , the <i>Pmmm</i> , the <i>Immm</i> , and the <i>I4/mmm</i> structures at different pressures.....                                         | S3   |
| <b>Table S2.</b> Calculated bulk and shear moduli of the <i>Amm2</i> and the <i>P-62m</i> structures at ambient pressure.....                                                                                                                                                                                                                         | S4   |
| <b>Table S3.</b> Vibrational modes, activity in the IR and Raman spectra for the <i>P-62m</i> structure at 0 GPa, the <i>Amm2</i> structure at 0 GPa, the <i>P2<sub>1</sub>/c</i> structure at 22 GPa, and the <i>Pbam</i> structure at 30GPa.....                                                                                                    | S4   |
| <b>Figure S1.</b> Simulated XRD pattern of various structures: (a) the <i>Amm2</i> and <i>P-62m</i> structures at ambient pressure and the intensity difference between both structures, (b) the <i>P2<sub>1</sub>/c</i> and <i>Pbam</i> structures at 22 GPa.....                                                                                    | S5   |
| <b>Figure S2.</b> Phonon dispersion curves and the phonon density of states for the various structures with different pressures: (a) the <i>P2<sub>1</sub>/c</i> structure at 22 GPa, (b) the <i>P2<sub>1</sub>/c</i> structure at 30 GPa, (c) the <i>Pbam</i> structure at 28 GPa, and (d) the <i>Pbam</i> structure at 300 GPa.....                 | S5   |
| <b>Figure S3.</b> Simulated XRD pattern of the crystal structures: (a) Na <sub>2</sub> O <sub>2</sub> -II at 550°C and ambient pressure obtained from the Tallman's experiment and (b) - (c) are the <i>I4/mmm</i> and <i>P4/mbm</i> structures at 0 K and ambient pressure obtained from the AIRSS searches.....                                     | S6   |
| <b>Figure S4.</b> Simulated XRD pattern of the crystal structures: (a) Na <sub>2</sub> O <sub>2</sub> -Q at room temperature and ambient pressure obtained from the Tallman's experiment and (b) - (d) are the <i>Pmmm</i> , <i>Immm</i> , and <i>C2/m</i> structures at 0 K and ambient pressure obtained from the AIRSS searches, respectively..... | S6   |
| <b>Figure S5.</b> Relative enthalpy of the various structures that obtained from the AIRSS searches with respect to the <i>Pbam</i> structure in the pressure range of 0-100 GPa.....                                                                                                                                                                 | S6   |

**Figure S6.** Plot of the angles in the same hexagonal Na layer of (a)  $2 \times 2 \times 2$  supercell of the  $P-62m$  structure and (b)  $2 \times 2 \times 2$  supercell of the primitive  $Amm2$  structure *versus* pressure from 0 to 20 GPa....S7

**Figure S7.** Plot of the differences in the angles between the  $Amm2$  and the  $P-62m$  structures at different pressures.....S8

**Figure S8.** Plots of total energy ( $E$ ), enthalpy ( $H$ ), and work done ( $PV$ ) of the  $Amm2$  structure with respect to the  $P-62m$  structure *versus* pressure.....S8

**Figure S9.** (a) Plot of the normalized lattice constants *versus* pressure ranging from 0 to 300 GPa. The  $a_0$ ,  $b_0$ , and  $c_0$  are the lattice constants at 0 GPa of the  $Amm2$  structure. (b) The volume change of the three structures of  $Na_2O_2$  at the pressure range of 0-300 GPa.....S9

**Figure S10.** (a) and (b) are the plots of normalized interatomic distances *versus* pressure for the O-O and Na-O in the  $Amm2$  structure as (c), respectively. (d) Plot of the cell angle ( $\gamma$ ) of the primitive  $Amm2$  structure *versus* pressure from 0 to 21 GPa.....S9

**Figure S11.** The peroxide group alignment in each phase of  $Na_2O_2$ : (a) the  $Amm2$  structure at 0 GPa, (b) the  $P-62m$  structure at 0 GPa, (c) the  $P2_1/c$  structure at 22 GPa, (d) the  $Pbam$  structure at 28 GPa, (e) the  $Pbam$  structure at 100 GPa, and (f) the  $Pbam$  structure at 300 GPa.....S10

**Figure S12.** Plot of Gibbs free energy *versus* temperature for the structures at different pressures: (a) 0 and 10 GPa, (b) 22 GPa, and (c) 28 GPa.....S11

**Figure S13.** Comparison of the atomic displacement between the Tallman's and Föppl's structures using the COMPSTRU program.....S12

**Figure S14.** (a) Simulated XRD pattern of the Tallman's and Föppl's structures, (b) – (c) the (100) plane of the Tallman's and Föppl's structures.....S12

**Figure S15.** Relative Gibbs free energy ( $\Delta G$ ) of the  $P-62m$  structure for the Tallman's and the Föppl's structures as a function of temperature at ambient pressure.....S12

**Figure S16.** Plot of the universal elastic anisotropy index ( $A^U$ ) for the  $P-62m$  and the  $Amm2$  structures *versus* pressure from 0 to 15 GPa.....S13

**Figure S17.** Plot of the phonon free energy for the  $Amm2$  structure *versus* volume at the different temperatures: (a) 55 K and (b) 296 K.....S13

**Table S1.** Structural data of Na<sub>2</sub>O<sub>2</sub> for the *Amm2*, the *P-62m*, the *P2<sub>1</sub>/c*, the *Pbam*, the *Pbam*<sup>‡</sup>, the *C2/m*, the *Pmmm*, the *Immm*, and the *I4/mmm* structures at different pressures.

| Pressure (GPa) | Structure/<br>Space group | Lattice parameter |         |        |            | Atom      | Site                      | Atomic coordinates (fractional) |          |          |          |    |    |          |          |          |
|----------------|---------------------------|-------------------|---------|--------|------------|-----------|---------------------------|---------------------------------|----------|----------|----------|----|----|----------|----------|----------|
|                |                           | a (Å)             | b (Å)   | c (Å)  | β (degree) |           |                           | x                               | y        | z        |          |    |    |          |          |          |
| 0              | <i>Amm2</i>               | 4.5103            | 10.8856 | 6.2819 | 90.000     | O1        | 4c                        | -0.32927                        | 0.00000  | 0.00000  |          |    |    |          |          |          |
|                |                           |                   |         |        |            | O2        | 8f                        | -0.17247                        | -0.16666 | -0.50001 |          |    |    |          |          |          |
|                |                           |                   |         |        |            | Na1       | 4e                        | -0.50000                        | 0.31748  | -0.31745 |          |    |    |          |          |          |
|                |                           |                   |         |        |            | Na3       | 2b                        | -0.50000                        | 0.00000  | -0.36509 |          |    |    |          |          |          |
|                |                           |                   |         |        |            | Na2       | 4d                        | 0.00000                         | 0.15033  | -0.15030 |          |    |    |          |          |          |
|                |                           |                   |         |        |            | Na4       | 2a                        | 0.00000                         | 0.00000  | -0.69939 |          |    |    |          |          |          |
| 0              | <i>P-62m</i>              | 6.2821            | 6.2821  | 4.5114 | 90.000     | O1        | 2e                        | 0.00000                         | 0.00000  | -0.17069 |          |    |    |          |          |          |
|                |                           |                   |         |        |            | O2        | 4h                        | 0.33333                         | 0.66667  | 0.32758  |          |    |    |          |          |          |
|                |                           |                   |         |        |            | Na1       | 3f                        | 0.36521                         | 0.00000  | 0.00000  |          |    |    |          |          |          |
|                |                           |                   |         |        |            | Na2       | 3g                        | 0.69951                         | 0.00000  | 0.50000  |          |    |    |          |          |          |
|                |                           |                   |         |        |            | 0<br>(RT) | <i>P-62m</i> <sup>†</sup> | 6.22                            | 6.22     | 4.47     | 90.000   | O1 | 2e | 0.00000  | 0.00000  | 0.16700  |
|                |                           |                   |         |        |            |           |                           |                                 |          |          |          | O2 | 4h | 0.33333  | 0.66667  | 0.33300  |
| 0<br>(RT)      | <i>P-62m</i> <sup>‡</sup> | 6.208             | 6.208   | 4.469  | 90.000     | Na1       | 3f                        | 0.36600                         | 0.00000  | 0.00000  |          |    |    |          |          |          |
|                |                           |                   |         |        |            | Na2       | 3g                        | 0.72400                         | 0.00000  | 0.50000  |          |    |    |          |          |          |
| 22             | <i>Amm2</i>               | 4.1525            | 10.0080 | 5.7770 | 90.000     | O1        | 2e                        | 0.00000                         | 0.00000  | 0.33200  |          |    |    |          |          |          |
|                |                           |                   |         |        |            | O2        | 4h                        | 0.33333                         | 0.66667  | 0.16800  |          |    |    |          |          |          |
|                |                           |                   |         |        |            | Na1       | 3f                        | 0.29500                         | 0.00000  | 0.00000  |          |    |    |          |          |          |
|                |                           |                   |         |        |            | Na2       | 3g                        | 0.63200                         | 0.00000  | 0.50000  |          |    |    |          |          |          |
|                |                           |                   |         |        |            | 22        | <i>P2<sub>1</sub>/c</i>   | 4.6421                          | 6.8657   | 3.6366   | 141.5836 | O1 | 4c | -0.32112 | 0.00000  | -0.00004 |
|                |                           |                   |         |        |            |           |                           |                                 |          |          |          | O2 | 8f | -0.18321 | -0.16664 | -0.50003 |
| 28             | <i>P2<sub>1</sub>/c</i>   | 4.5710            | 6.7955  | 3.5762 | 141.4831   | Na1       | 4e                        | -0.50000                        | 0.31479  | -0.31479 |          |    |    |          |          |          |
|                |                           |                   |         |        |            | Na3       | 2b                        | -0.50000                        | 0.00000  | -0.37038 |          |    |    |          |          |          |
| 28             | <i>Pbam</i>               | 3.5758            | 6.7976  | 2.8461 | 90.000     | Na2       | 4d                        | 0.00000                         | 0.14821  | -0.14814 |          |    |    |          |          |          |
|                |                           |                   |         |        |            | Na4       | 2a                        | 0.00000                         | 0.00000  | -0.70358 |          |    |    |          |          |          |
| 28             | <i>Pbam</i> <sup>‡</sup>  | 3.5743            | 6.8001  | 2.8459 | 90.000     | O         | 4e                        | -0.49999                        | 0.09003  | -0.37268 |          |    |    |          |          |          |
|                |                           |                   |         |        |            | Na        | 4e                        | -0.00005                        | 0.14092  | 0.66039  |          |    |    |          |          |          |
| 100            | <i>Pbam</i>               | 3.2502            | 6.2622  | 2.6121 | 90.000     | O         | 4e                        | -0.49999                        | 0.09082  | -0.37198 |          |    |    |          |          |          |
|                |                           |                   |         |        |            | Na        | 4e                        | -0.00003                        | 0.14129  | 0.65621  |          |    |    |          |          |          |
| 200            | <i>Pbam</i>               | 3.0575            | 5.9049  | 2.4648 | 90.000     | O         | 4g                        | 0.12768                         | 0.09089  | 0.00000  |          |    |    |          |          |          |
|                |                           |                   |         |        |            | Na        | 4h                        | 0.15598                         | 0.35872  | 0.50000  |          |    |    |          |          |          |
| 300            | <i>Pbam</i>               | 2.9413            | 5.6869  | 2.3741 | 90.000     | O         | 4g                        | -0.37247                        | 0.40908  | -0.50000 |          |    |    |          |          |          |
|                |                           |                   |         |        |            | Na        | 4g                        | -0.84429                        | 0.35871  | 0.00000  |          |    |    |          |          |          |
| 0              | <i>C2/m</i>               | 7.8720            | 3.6262  | 6.1470 | 141.4238   | O         | 4g                        | 0.13333                         | 0.09480  | 0.00000  |          |    |    |          |          |          |
|                |                           |                   |         |        |            | Na        | 4h                        | 0.14474                         | 0.35744  | 0.50000  |          |    |    |          |          |          |
| 0              | <i>Pmmm</i>               | 6.1415            | 3.6241  | 4.9218 | 90.000     | O         | 4g                        | 0.13688                         | 0.09644  | 0.00000  |          |    |    |          |          |          |
|                |                           |                   |         |        |            | Na        | 4h                        | 0.14323                         | 0.35714  | 0.50000  |          |    |    |          |          |          |
| 0              | <i>Immm</i>               | 6.1414            | 3.6242  | 4.9213 | 90.000     | O         | 4g                        | 0.13887                         | 0.09716  | 0.00000  |          |    |    |          |          |          |
|                |                           |                   |         |        |            | Na        | 4h                        | 0.14311                         | 0.35701  | 0.50000  |          |    |    |          |          |          |
| 0              | <i>I4/mmm</i>             | 4.4082            | 4.4082  | 5.3359 | 90.000     | O         | 4i                        | 0.14311                         | 0.35701  | 0.50000  |          |    |    |          |          |          |
|                |                           |                   |         |        |            | Na        | 4i                        | 0.49998                         | -0.00000 | 0.72763  |          |    |    |          |          |          |
| 0              | <i>I4/mmm</i>             | 6.1415            | 3.6241  | 4.9218 | 90.000     | O1        | 4i                        | 0.84296                         | -0.00000 | 1.34321  |          |    |    |          |          |          |
|                |                           |                   |         |        |            | Na        | 4i                        | 0.49998                         | -0.00000 | 0.72763  |          |    |    |          |          |          |
|                |                           |                   |         |        |            | O2        | 2s                        | 0.50000                         | 0.00000  | 0.15645  |          |    |    |          |          |          |
|                |                           |                   |         |        |            | O2        | 2r                        | 0.00000                         | 0.50000  | 0.65645  |          |    |    |          |          |          |
|                |                           |                   |         |        |            | Na1       | 2j                        | 0.22799                         | 0.00000  | 0.50000  |          |    |    |          |          |          |
|                |                           |                   |         |        |            | Na2       | 2k                        | 0.72796                         | 0.50000  | 0.00000  |          |    |    |          |          |          |
| 0              | <i>I4/mmm</i>             | 6.1414            | 3.6242  | 4.9213 | 90.000     | O         | 4j                        | 0.50000                         | 0.00000  | -0.84353 |          |    |    |          |          |          |
|                |                           |                   |         |        |            | Na        | 4f                        | 0.22797                         | 0.00000  | -0.50000 |          |    |    |          |          |          |
| 0              | <i>I4/mmm</i>             | 4.4082            | 4.4082  | 5.3359 | 90.000     | O         | 4e                        | -0.50000                        | -0.50000 | 0.35278  |          |    |    |          |          |          |
|                |                           |                   |         |        |            | Na        | 4c                        | 0.00000                         | 0.50000  | 1.00000  |          |    |    |          |          |          |

<sup>†</sup> The *P-62m* structure of Na<sub>2</sub>O<sub>2</sub> at ambient conditions proposed by Tallman *et al.*<sup>2</sup>

<sup>‡</sup> The *P-62m* structure of Na<sub>2</sub>O<sub>2</sub> at ambient conditions proposed by Föpl.<sup>3</sup>

<sup>‡</sup> The relaxed *Pbam* structure of Na<sub>2</sub>O<sub>2</sub> predicted by Deng *et al.*<sup>1</sup>

RT: Room temperature

**Table S2.** Calculated bulk and shear moduli of the *Amm2* and the *P-62m* structures at ambient pressure.

| Structure/Space group     | Condition  | Bulk modulus (GPa) |       | Shear modulus (GPa) |       |
|---------------------------|------------|--------------------|-------|---------------------|-------|
|                           |            | GGA-PBE            | LDA   | GGA-PBE             | LDA   |
| <i>Amm2</i>               | 0 GPa, 0 K | 49.16              | 64.53 | 31.33               | 38.98 |
| <i>P-62m</i>              |            | 48.95              | 64.72 | 29.88               | 37.59 |
| <i>P-62m</i> <sup>4</sup> |            | 56.40              | -     | -                   | -     |
| <i>P-62m</i> <sup>5</sup> |            | 49                 | -     | 29                  | -     |
| <i>P-62m</i> <sup>†</sup> | ambient    | 55.82              | 40.19 | 31.14               | 27.92 |
| <i>P-62m</i> <sup>§</sup> |            | 57.16              | 41.37 | 32.11               | 29.08 |

<sup>†</sup>using the structural data proposed by Tallman *et al.*<sup>2</sup>

<sup>§</sup>using the structural data proposed by Föppel *et al.*<sup>3</sup>

**Table S3.** Vibrational modes, activity in the IR and Raman spectra for the *P-62m* structure at 0 GPa, the *Amm2* structure at 0 GPa, the *P2<sub>1</sub>/c* structure at 22 GPa, and the *Pbam* structure at 30 GPa.

| Structure/<br>Space group         | Vibrational<br>mode | Frequency<br>(cm <sup>-1</sup> )               | Activity                      | Structure/<br>Space group | Vibrational<br>mode | Frequency<br>(cm <sup>-1</sup> )                                          | Activity                                                                                          |                                                                 |
|-----------------------------------|---------------------|------------------------------------------------|-------------------------------|---------------------------|---------------------|---------------------------------------------------------------------------|---------------------------------------------------------------------------------------------------|-----------------------------------------------------------------|
| <i>P-62m</i> at 0 GPa             | A <sub>2</sub>      | 129.3, 195.0,<br>292.3                         | IR                            | <i>Amm2</i> at 0 GPa      | B <sub>1</sub>      | 223.4, 232.7,<br>260.4, 263.6,<br>271.8, 305.1,<br>314.5, 340.8,<br>779.1 | IR /<br>Raman                                                                                     |                                                                 |
|                                   | E'                  | 169.6, 203.4,<br>224.9, 286.4,<br>316.3, 338.0 | IR /<br>Raman                 |                           |                     | B <sub>2</sub>                                                            | 124.4, 183.2,<br>216.3, 219.7,<br>283.8, 294.0,<br>331.3, 337.2<br>225.0, 227.9,<br>254.8, 261.4, | IR /<br>Raman                                                   |
|                                   | A'' <sub>1</sub>    | 125.5                                          | -                             |                           |                     |                                                                           | A <sub>1</sub>                                                                                    | 295.3, 310.9,<br>317.7, 331.4,<br>784.9, 821.5<br>108.2, 196.7, |
|                                   | A' <sub>1</sub>     | 169.6, 278.8,<br>780.8, 821.0                  | Raman                         |                           | A <sub>2</sub>      |                                                                           | 210.9, 262.2,<br>307.5, 358.0                                                                     | Raman                                                           |
|                                   | A' <sub>2</sub>     | 180.8, 275.5,<br>773.5                         | -                             |                           | B <sub>1u</sub>     | 405.9                                                                     | IR                                                                                                |                                                                 |
|                                   | E''                 | 221.8, 226.5,<br>242.5, 293.2,<br>318.4        | Raman                         |                           |                     | B <sub>2u</sub>                                                           | 262.5, 318.7,<br>449.9                                                                            | IR                                                              |
| <i>P2<sub>1</sub>/c</i> at 22 GPa | A <sub>u</sub>      | 194.9, 237.2,<br>295.1, 341.9,<br>418.5        | IR                            | B <sub>3u</sub>           |                     | 305.9, 332.1,<br>432.6                                                    | IR                                                                                                |                                                                 |
|                                   | B <sub>u</sub>      | 262.3, 305.3,<br>380.5, 415.3<br>237.2, 268.2, | IR                            | A <sub>u</sub>            | 199.3, 359.7        | -                                                                         |                                                                                                   |                                                                 |
|                                   | A <sub>g</sub>      | 345.8, 372.8,<br>433.3, 780.8<br>244.4, 337.4, | Raman                         | B <sub>2g</sub>           | 236.2, 361.1        | Raman                                                                     |                                                                                                   |                                                                 |
|                                   | B <sub>g</sub>      | 348.7, 412.6,<br>440.0, 766.6                  | Raman                         | B <sub>3g</sub>           | 255.8, 336.8        | Raman                                                                     |                                                                                                   |                                                                 |
|                                   |                     | A <sub>g</sub>                                 | 274.1, 378.0,<br>461.3, 815.3 | Raman                     | B <sub>1g</sub>     | 357.6, 431.6,<br>461.9, 797.2                                             | Raman                                                                                             |                                                                 |

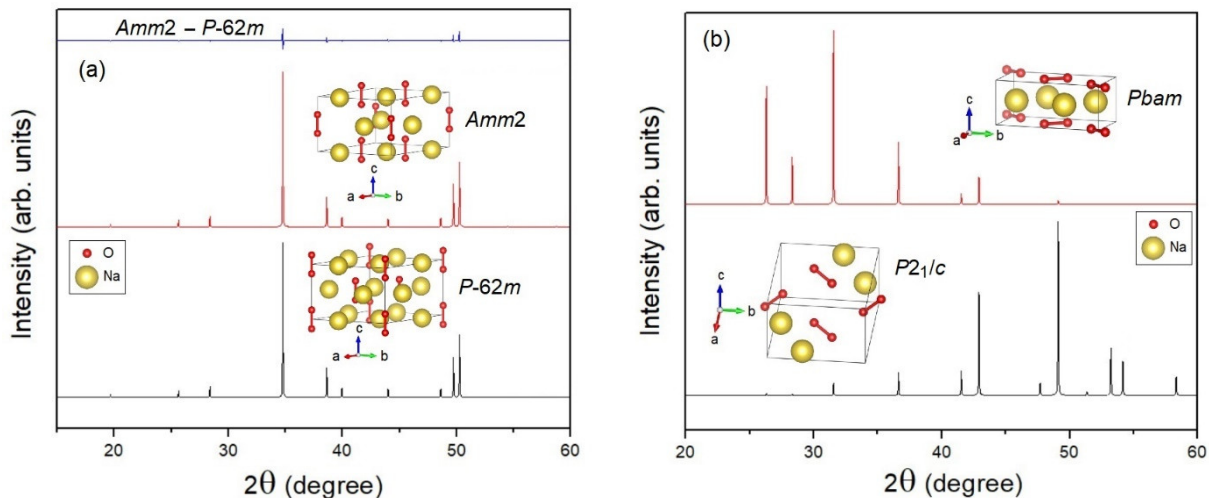

**Figure S1.** Simulated XRD pattern of various structures: (a) the *Amm2* and *P-62m* structures at ambient pressure and the intensity difference between both structures, (b) the *P2<sub>1</sub>/c* and *Pbam* structures at 22 GPa.

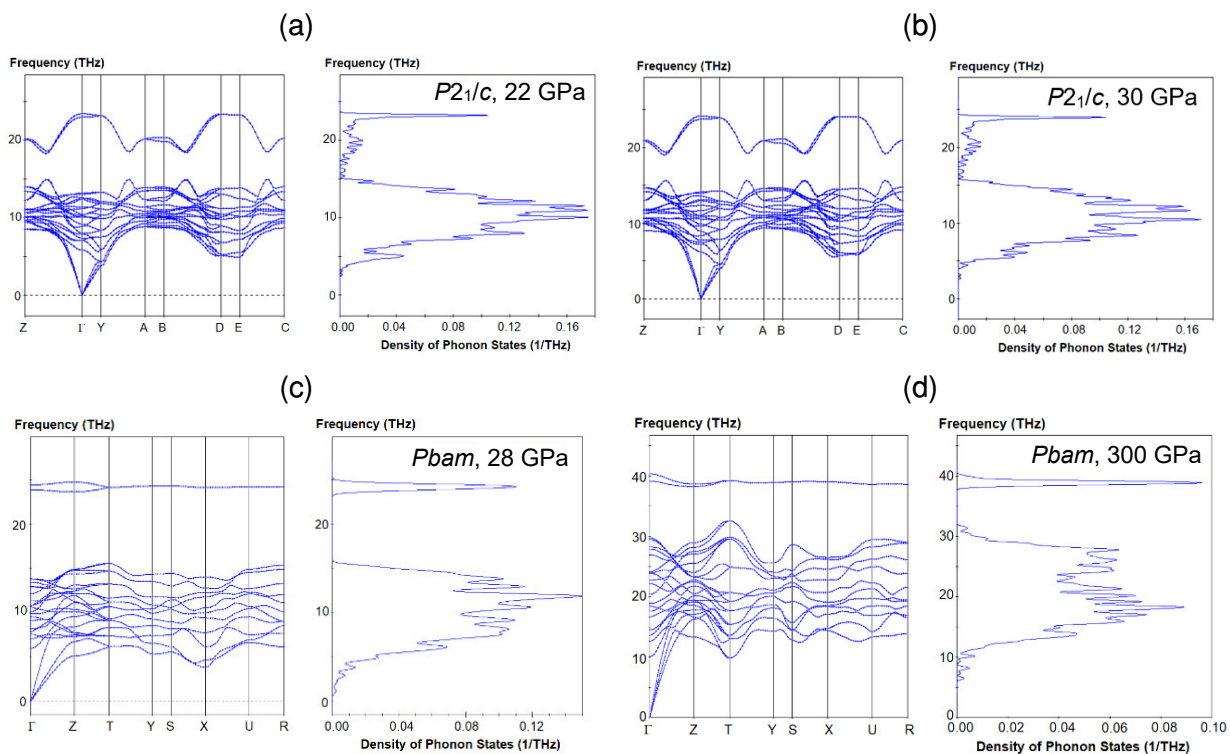

**Figure S2.** Phonon dispersion curves and the phonon density of states for the various structures with different pressures: (a) the *P2<sub>1</sub>/c* structure at 22 GPa, (b) the *P2<sub>1</sub>/c* structure at 30 GPa, (c) the *Pbam* structure at 28 GPa, and (d) the *Pbam* structure at 300 GPa.

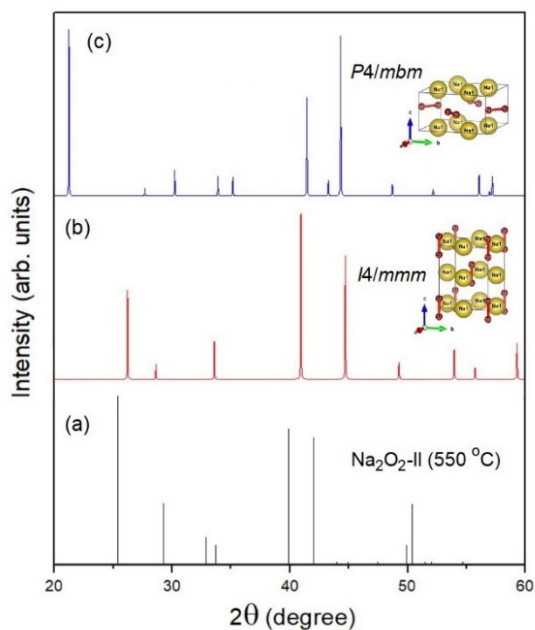

**Figure S3.** Simulated XRD pattern of the crystal structures: (a)  $\text{Na}_2\text{O}_2$ -II at 550°C and ambient pressure obtained from the Tallman's experiment <sup>6</sup> and (b) - (c) are the  $I4/mmm$  and  $P4/mbm$  structures at 0 K and ambient pressure obtained from the AIRSS searches.

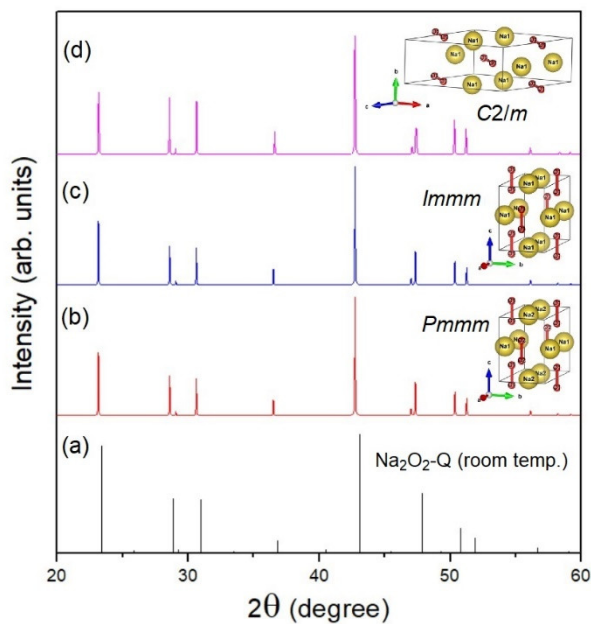

**Figure S4.** Simulated XRD pattern of the crystal structures: (a)  $\text{Na}_2\text{O}_2$ -Q at room temperature and ambient pressure obtained from the Tallman's experiment <sup>6</sup> and (b) - (d) are the  $Pmmm$ ,  $Immm$ , and  $C2/m$  structures at 0 K and ambient pressure obtained from the AIRSS searches, respectively.

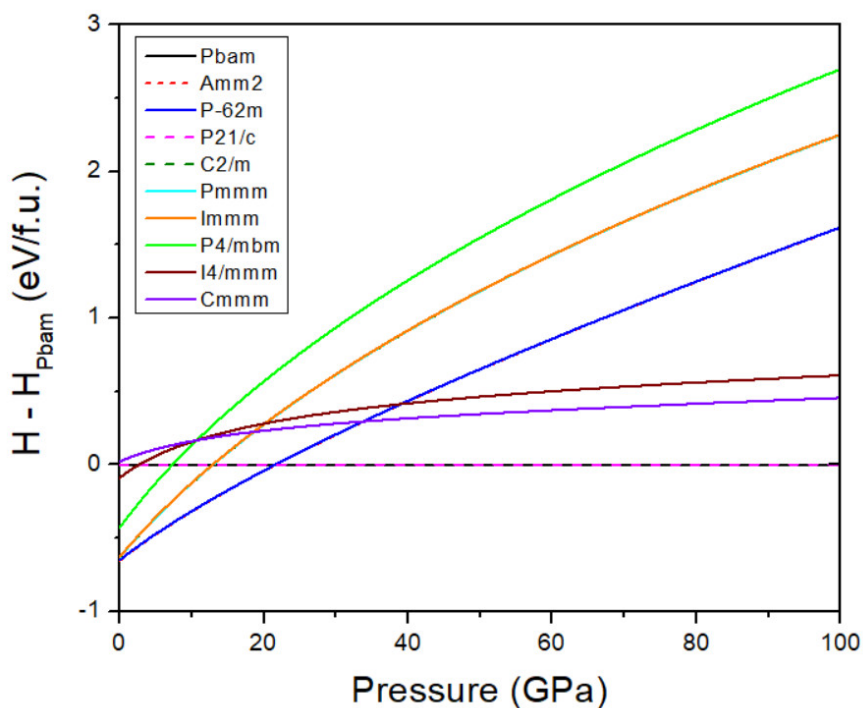

**Figure S5.** Relative enthalpy of the various structures that obtained from the AIRSS searches with respect to the  $Pbam$  structure in the pressure range of 0-100 GPa.

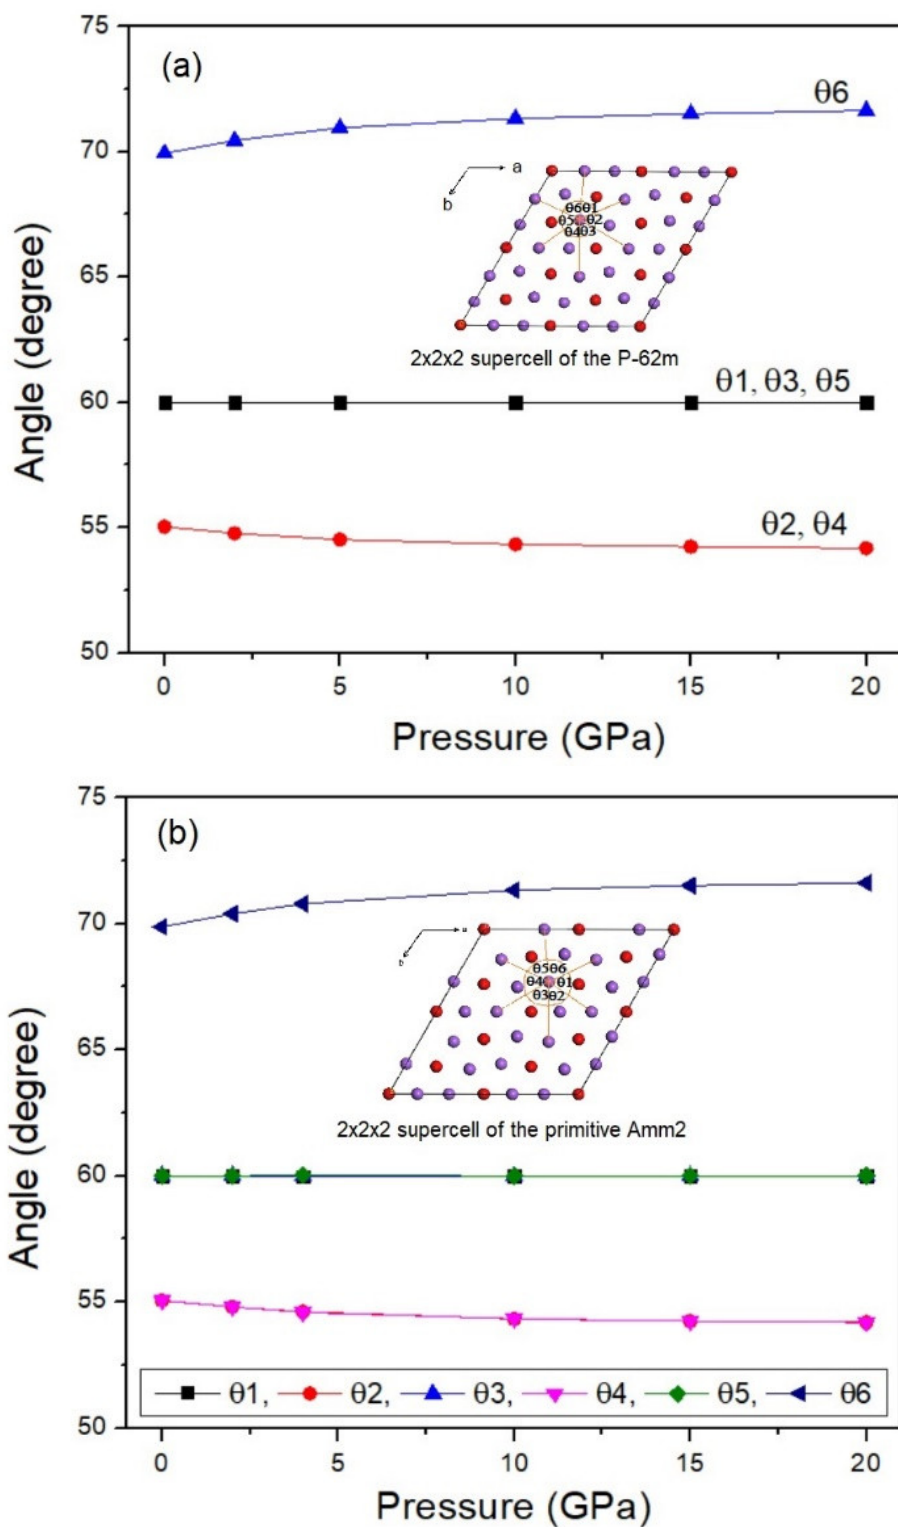

**Figure S6.** Plot of the angles in the same hexagonal Na layer of (a)  $2 \times 2 \times 2$  supercell of the  $P-62m$  structure and (b)  $2 \times 2 \times 2$  supercell of the primitive  $Amm2$  structure versus pressure from 0 to 20 GPa.

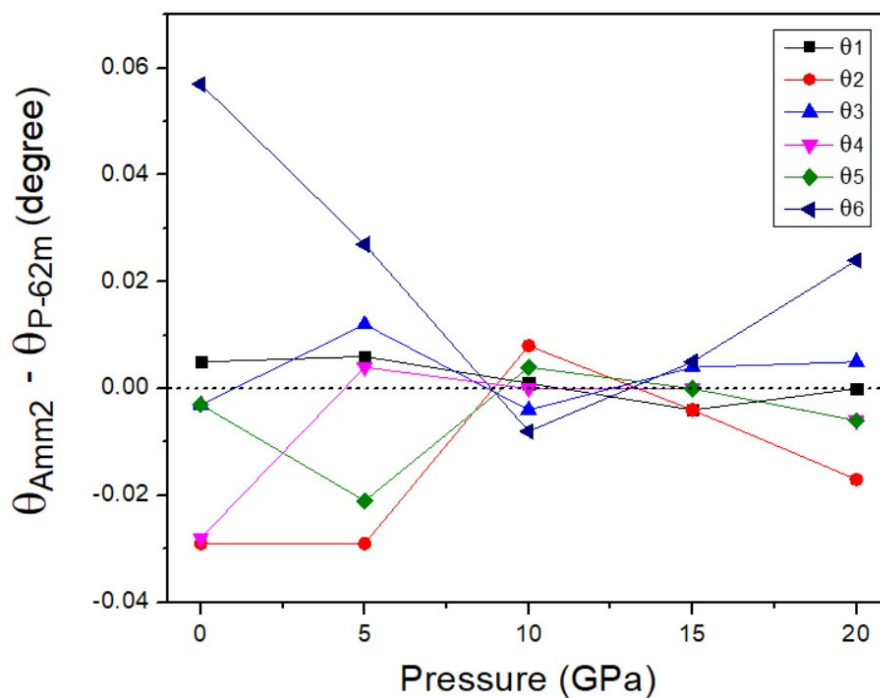

**Figure S7.** Plot of the differences in the angles between the Amm2 and the P-62m structures at different pressures.

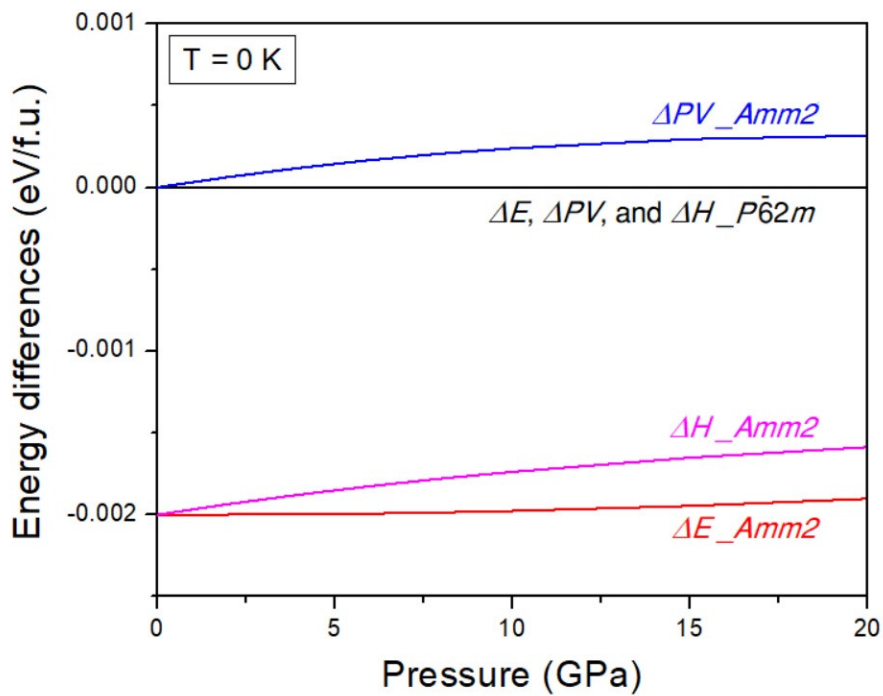

**Figure S8.** Plot of total energy ( $E$ ), enthalpy ( $H$ ), and work done ( $PV$ ) of the Amm2 structure with respect to the P-62m structure versus pressure.



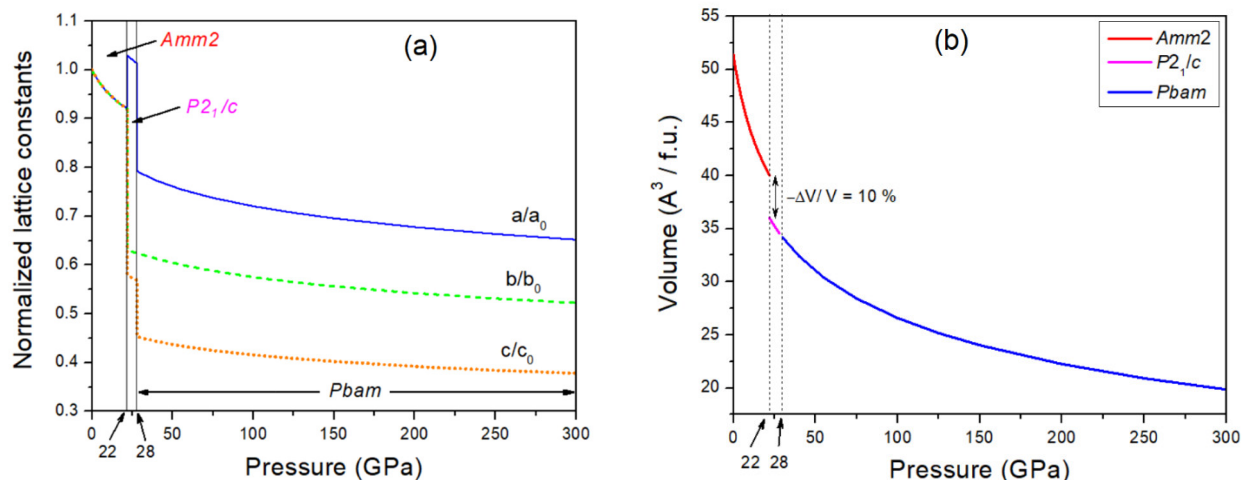

**Figure S9.** (a) Plot of the normalized lattice constants *versus* pressure ranging from 0 to 300 GPa. The  $a_0$ ,  $b_0$ , and  $c_0$  are the lattice constants at 0 GPa of the  $Amm2$  structure. (b) The volume change of the three structure of  $\text{Na}_2\text{O}_2$  at the pressure range of 0-300 GPa: the  $Amm2$ , the  $P2_1/c$ , and the  $Pbam$  structures.

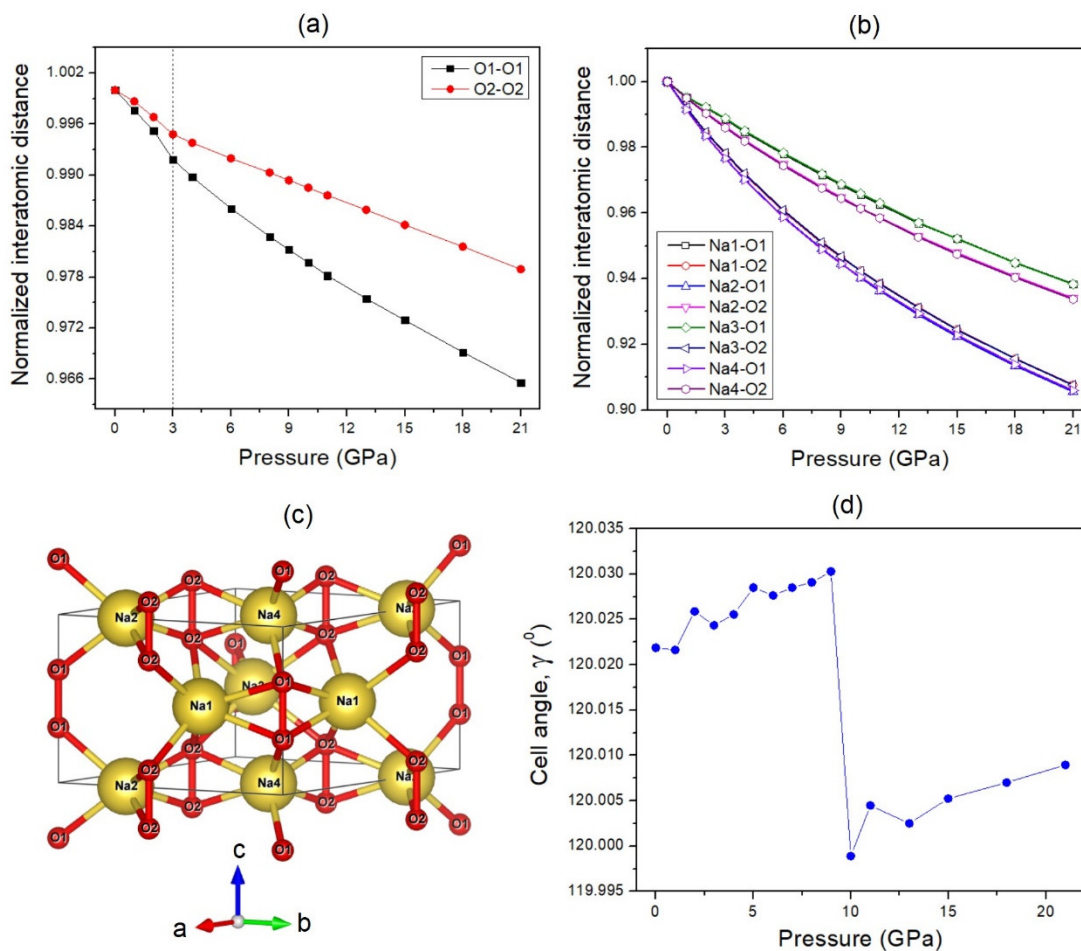

**Figure S10.** (a) and (b) are the plots of normalized interatomic distances *versus* pressure for the O-O and Na-O in the  $Amm2$  structure as (c), respectively. (d) Plot of the cell angle ( $\gamma$ ) of the primitive  $Amm2$  structure *versus* pressure from 0 to 21 GPa.

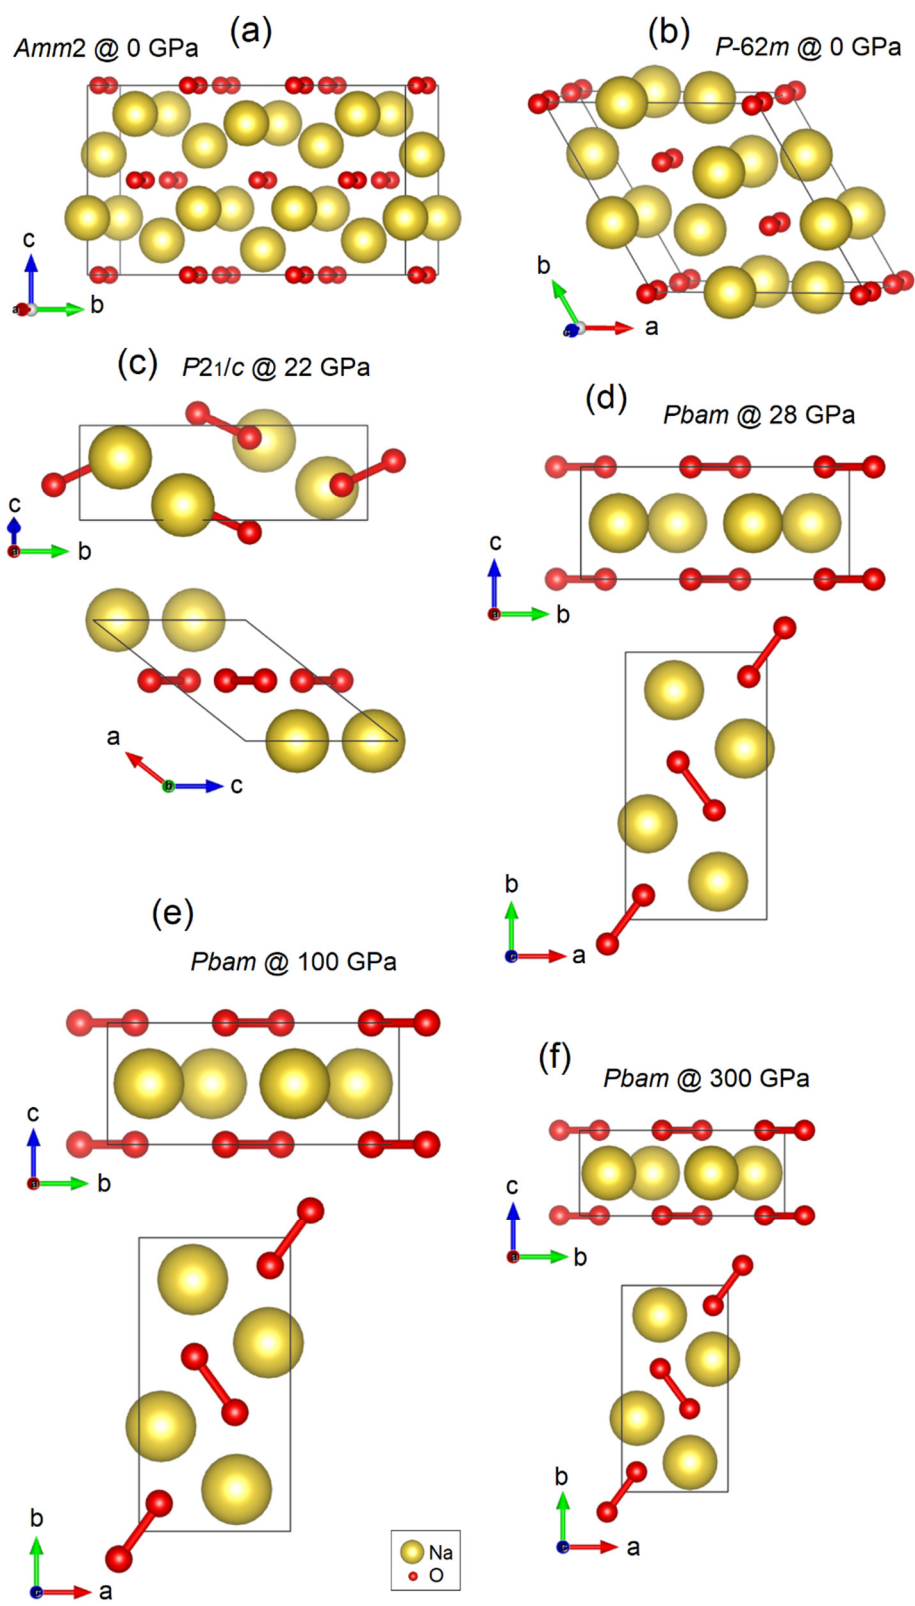

**Figure S11.** The peroxide group alignment in each phase of  $\text{Na}_2\text{O}_2$ : (a) the  $Amm2$  structure at 0 GPa, (b) the  $P-62m$  structure at 0 GPa, (c) the  $P2_1/c$  structure at 22 GPa, (d) the  $Pbam$  structure at 28 GPa, (e) the  $Pbam$  structure at 100 GPa, and (f) the  $Pbam$  structure at 300 GPa.

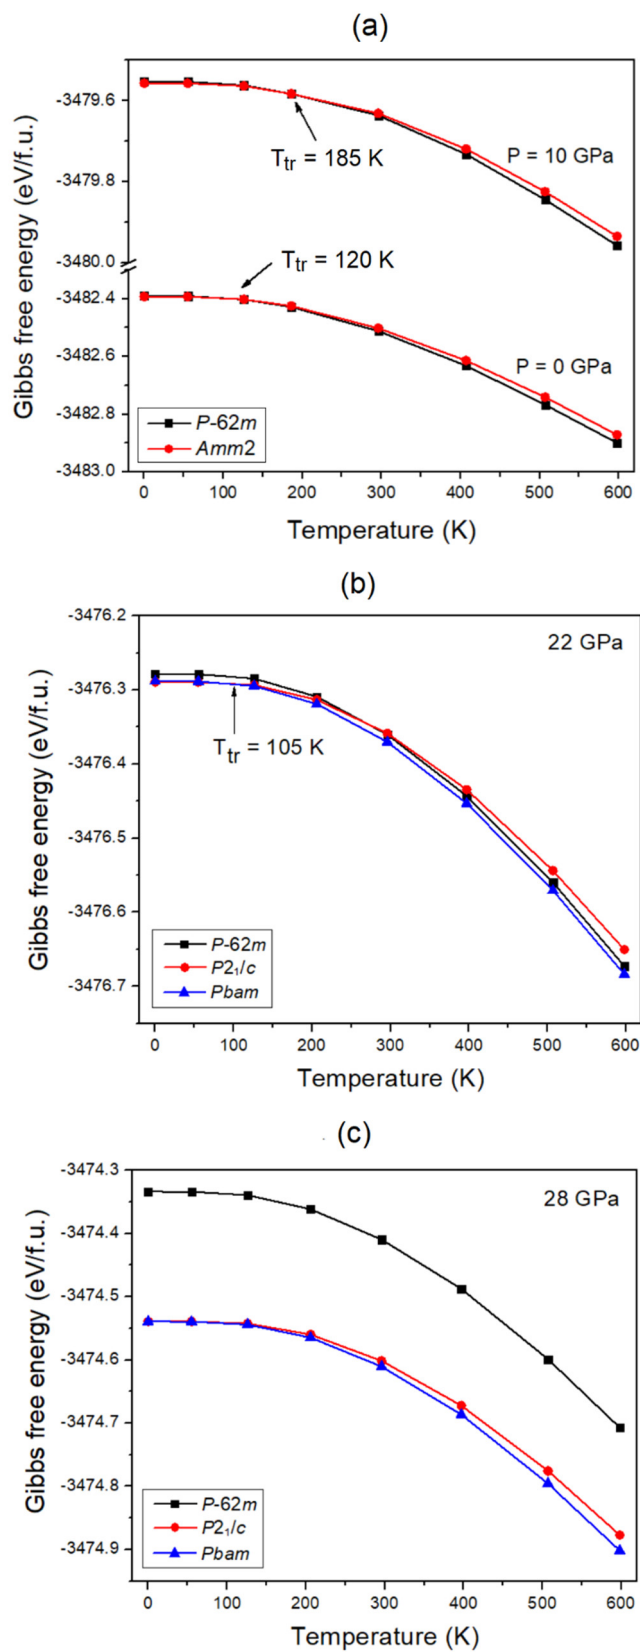

**Figure S12.** Plot of Gibbs free energy *versus* temperature for the structures at different pressures: (a) 0 and 10 GPa, (b) 22 GPa, and (c) 28 GPa.

| WP | Atom           | Atomic Displacements |        |         |        |
|----|----------------|----------------------|--------|---------|--------|
|    |                | $u_x$                | $u_y$  | $u_z$   | $ u $  |
| 3f | (x,0,0) Na2    | 0.0020               | 0.0000 | 0.0000  | 0.0124 |
| 2e | (0,0,z) O1     | 0.0000               | 0.0000 | 0.0010  | 0.0045 |
| 3g | (x,0,1/2) Na1  | -0.0190              | 0.0000 | 0.0000  | 0.1182 |
| 4h | (1/3,2/3,z) O2 | 0.0000               | 0.0000 | -0.0010 | 0.0045 |

NOTE:  $u_x$ ,  $u_y$  and  $u_z$  are given in relative units.  $|u|$  is the absolute distance given in Å

Available from: <http://www.cryst.ehu.es/cgi-bin/cryst/programs/nph-compstru>

**Figure S13.** Comparison of the atomic displacement between the Tallman's and Föppl's structures using the COMPSTRU program.<sup>7</sup>

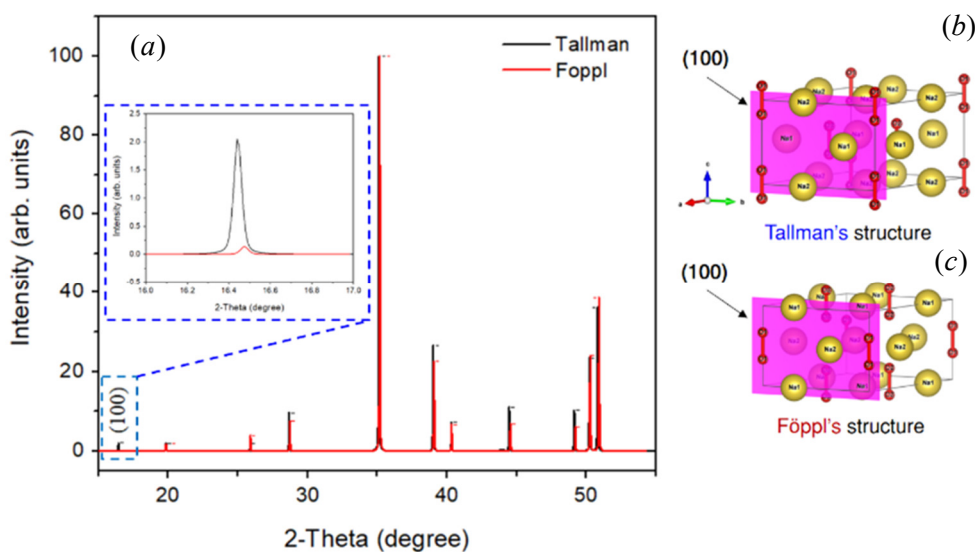

**Figure R14.** (a) Simulated XRD pattern of the Tallman's and Föppl's structures, (b) – (c) the (100) plane of the Tallman's and Föppl's structures.

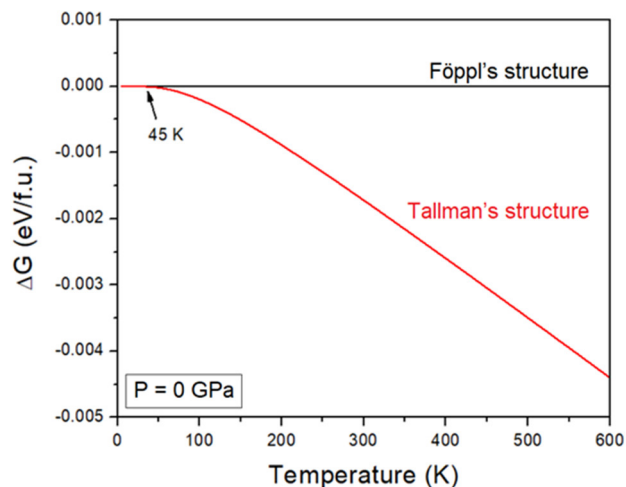

**Figure S15.** Relative Gibbs free energy ( $\Delta G$ ) of the  $P-62m$  structure between the Tallman's and the Föppl's structures as a function of temperature at ambient pressure.

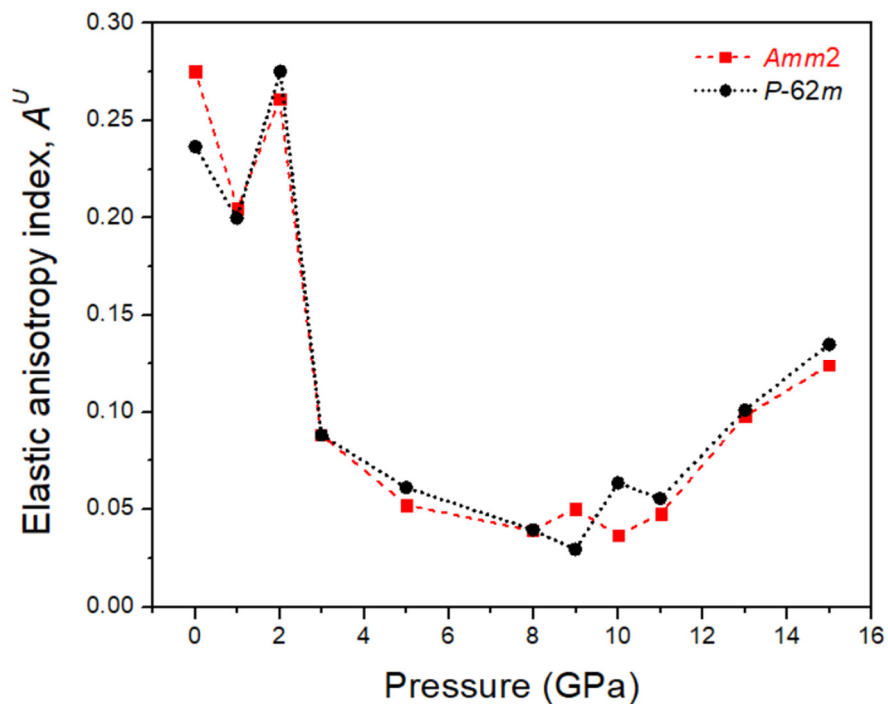

**Figure S16.** Plot of the universal elastic anisotropy index ( $A^U$ ) for the  $P-62m$  and the  $Amm2$  structures *versus* pressure from 0 to 15 GPa.

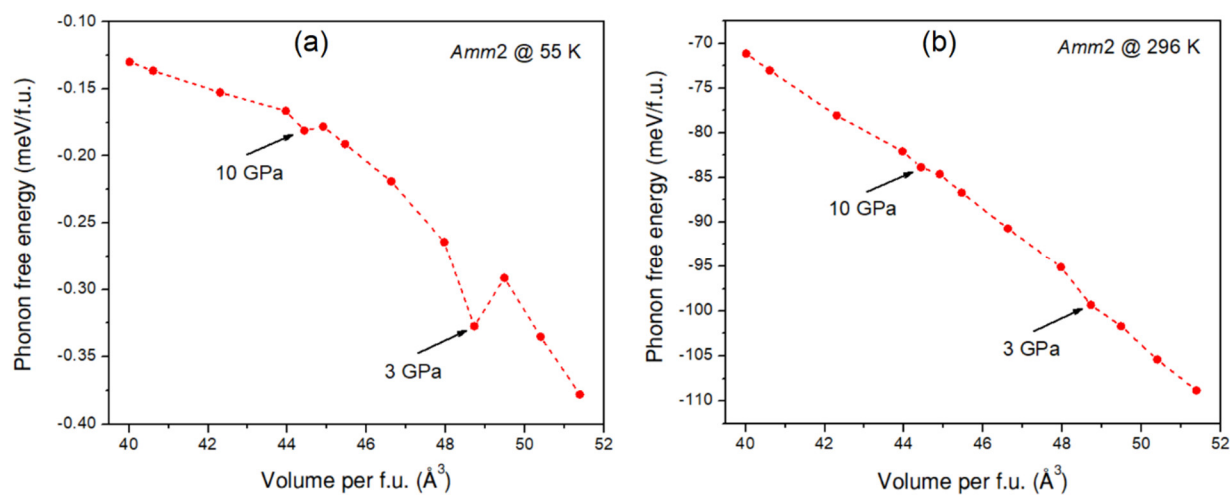

**Figure S17.** Plot of the phonon free energy for the  $Amm2$  structure *versus* volume at the different temperatures: (a) 55 K and (b) 296 K.

## References

- [1] N. Deng, W. Wang, G. Yang and Y. Qiu, *RSC Adv.*, 2015, **5**, 104337-104342.
- [2] R. L. Tallman, J. L. Margrave and S. W. Bailey, *J. Am. Chem. Soc.*, 1957, **79**, 2979-2980.
- [3] H. Föppl, *Z. Anorg. Allg. Chem.*, 1957, **291**, 12-50.
- [4] M. V. Aleinikova, Y. N. Zhuravlev and D. V. Korabelnikov, *Russ. Phys. J.*, 2012, **55**, 495-500.
- [5] M. de Jong, W. Chen, T. Angsten, A. Jain, R. Notestine, A. Gamst, M. Sluiter, C. K. Ande, S. van der Zwaag, J. J. Plata, C. Toher, S. Curtarolo, G. Ceder, K. A. Persson and M. Asta, *Sci. Data.*, 2015, **2**, 150009.
- [6] R. L. Tallman and J. L. Margrave, *J. Inorg. Nucl. Chem.*, 1961, **21**, 40-44.
- [7] G. de la Flor, D. Orobengoa, E. Tasci, J. M. Perez-Mato and M. I. Aroyo, *J. Appl. Cryst.*, 2016, **49**, 653-664.
